# Supplementary material for: Exsolved Nanoparticles Decorated Double Perovskites as High-Performance Anodes for Direct-Ammonia Solid Oxide Fuel Cells
Source: MDPI journal article supplement (doi:10.3390/catal13060996), 2023-06-12
Supplement: s1 [file s1]

## Supporting information

# Exsolved Nanoparticles Decorated Double Perovskites as High-Performance Anodes for Direct-Ammonia Solid Oxide Fuel Cells

Yongning Yi <sup>1,†</sup>, Jiaming Chen <sup>1,†</sup>, Meigui Xu <sup>1</sup>, Guangming Yang <sup>1</sup>, Ran Ran <sup>1</sup>, Wei Zhou <sup>1</sup>, Wei Wang <sup>1,\*</sup> and Zongping Shao <sup>1,2,\*</sup>

<sup>1</sup> State Key Laboratory of Materials-Oriented Chemical Engineering, College of Chemical Engineering, Nanjing Tech University, Nanjing 210009, China

<sup>2</sup> WA School of Mines: Minerals, Energy and Chemical Engineering, Curtin University, Perth, WA 6845, Australia

\* Correspondence: wangwei@njtech.edu.cn (W.W.); shaozp@njtech.edu.cn (Z.S.)

† These authors contributed equally to this work.

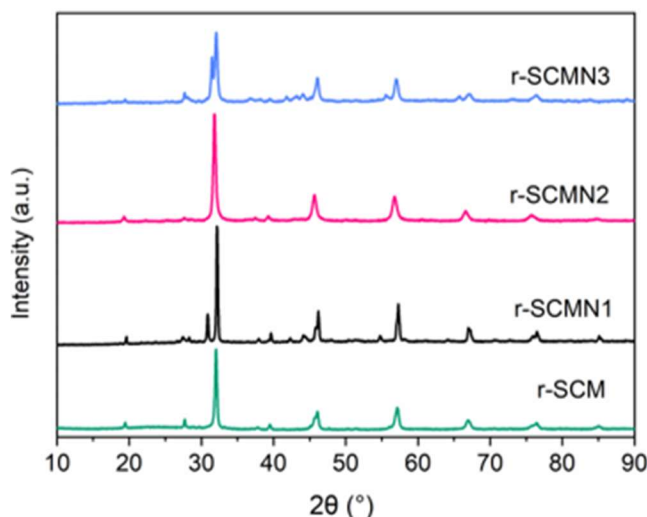

**Figure S1.** XRD patterns of reduced SCM and SCM samples.

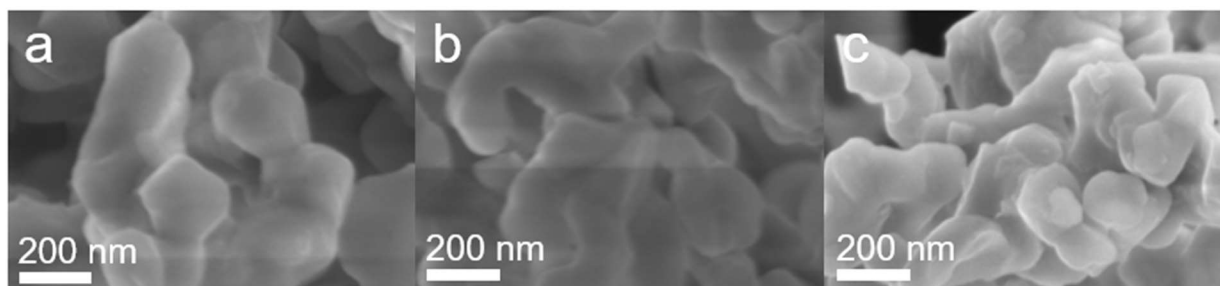

**Figure S2.** SEM images of (a) SCM1, (b) SCM2 and (c) SCM3 samples.

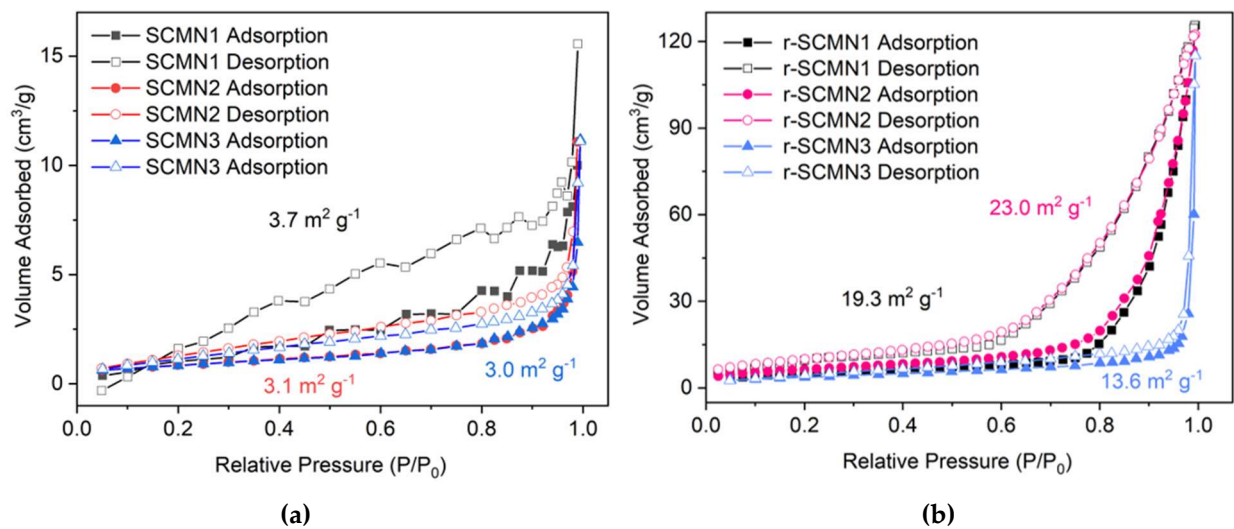

**Figure S3.** Nitrogen adsorption/desorption isotherms of SCM1, SCM2 and SCM3 samples (a) before and (b) after the reduction.

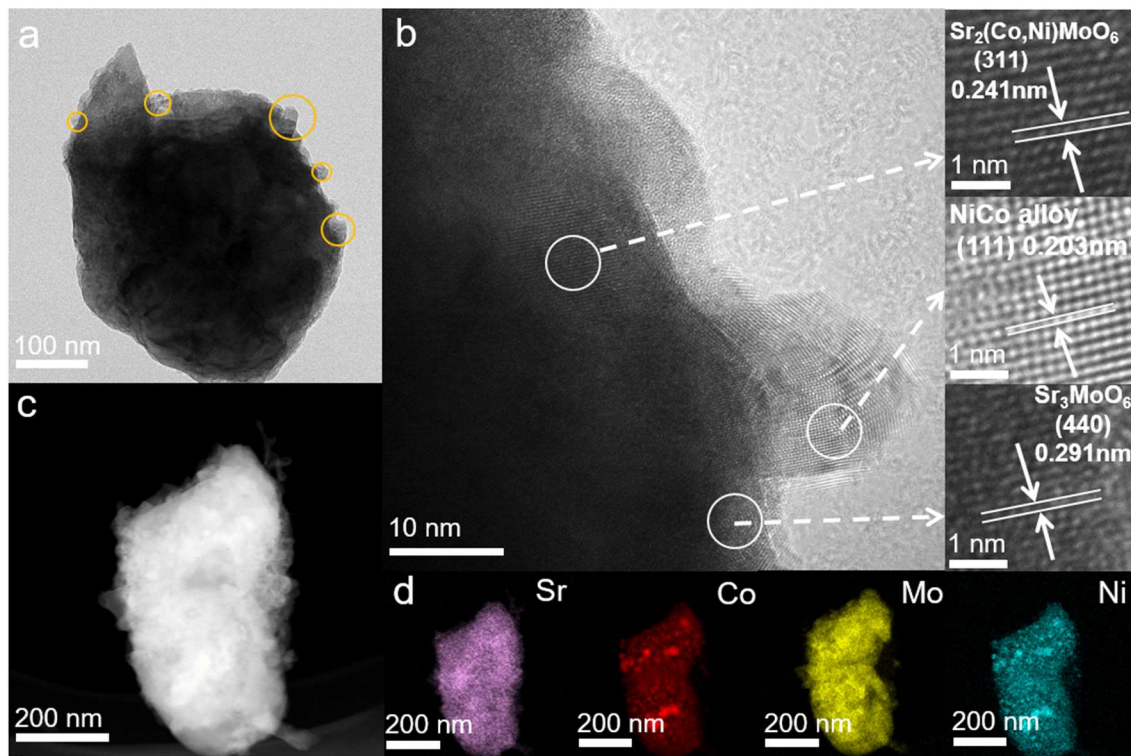

**Figure S4.** (a) TEM, (b) HR-TEM, (c) STEM and (d) EDX mapping images of r-SCMN1 sample.

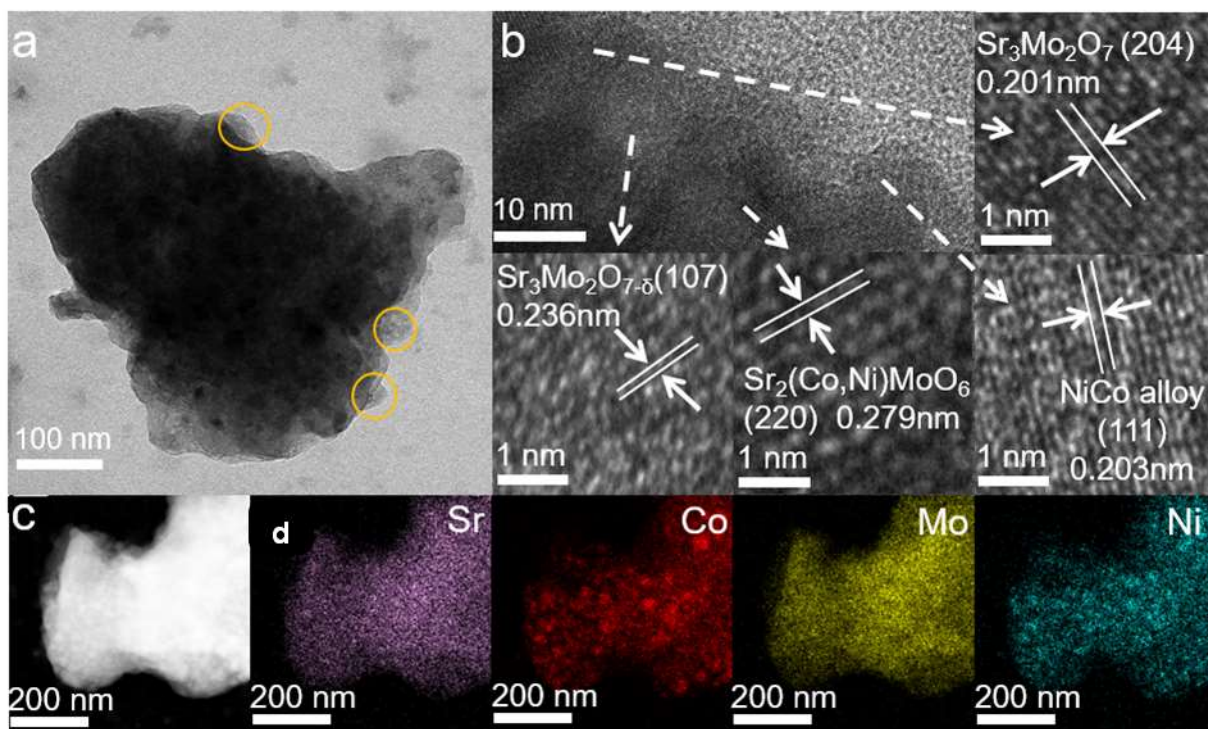

**Figure S5.** (a) TEM, (b) HR-TEM, (c) STEM and (d) EDX mapping images of r-SCMN3 sample.

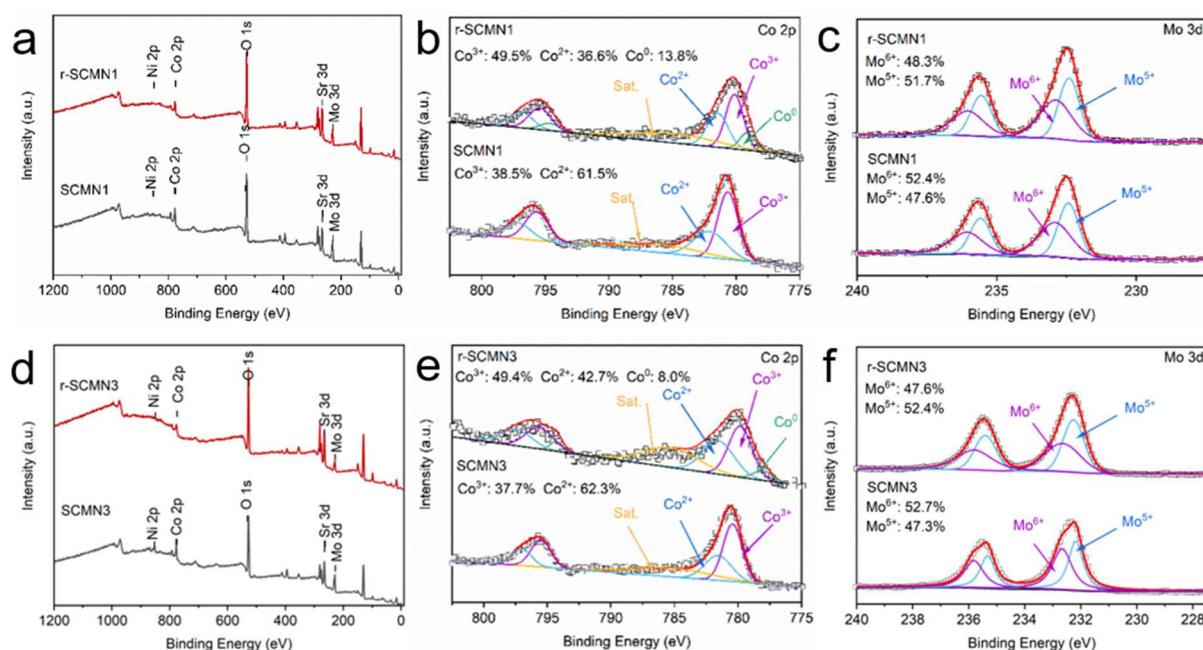

**Figure S6.** XPS spectra of SCM1 and SCM3 samples before and after the reduction: (a,d) XPS survey, (b,e) Co 2p and (c,f) Mo 3d.



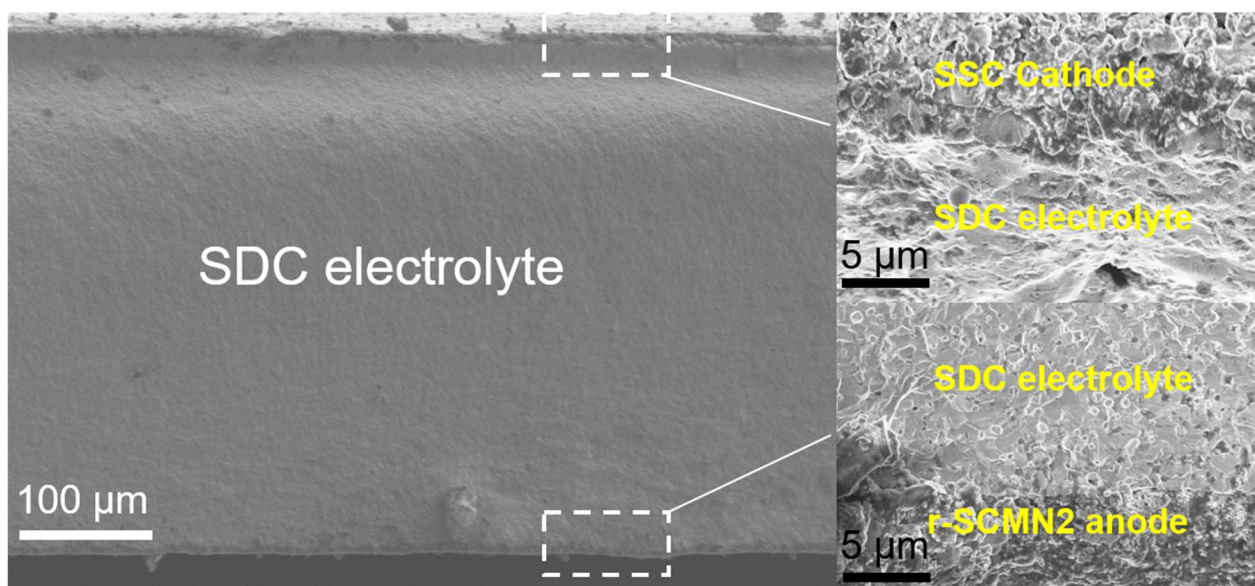

**Figure S7.** Typical cross-sectional SEM images of a fuel cell with r-SCMN2 anode.

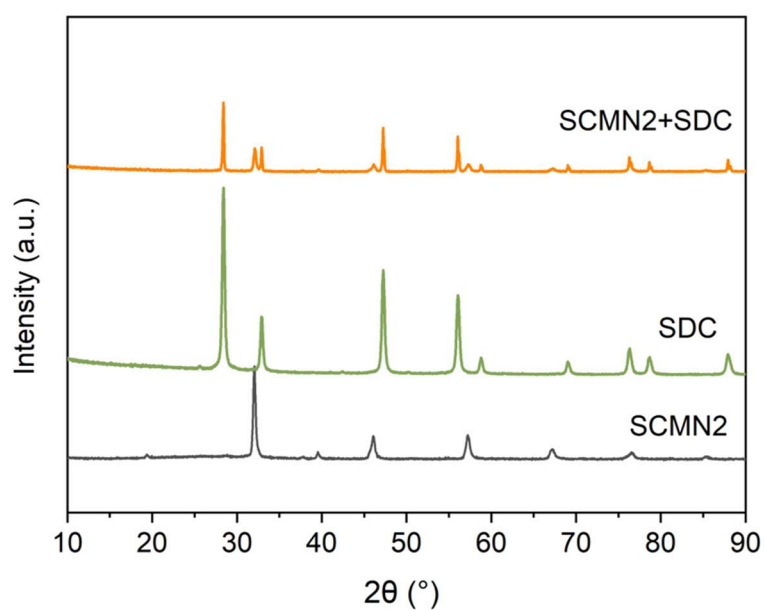

**Figure S8.** XRD patterns of SDC, SCM2 and SDC+SCMN2 composite (1:1, weight ratio) prepared by physical mixing after a calcination at 1000 °C for 2 h in air.

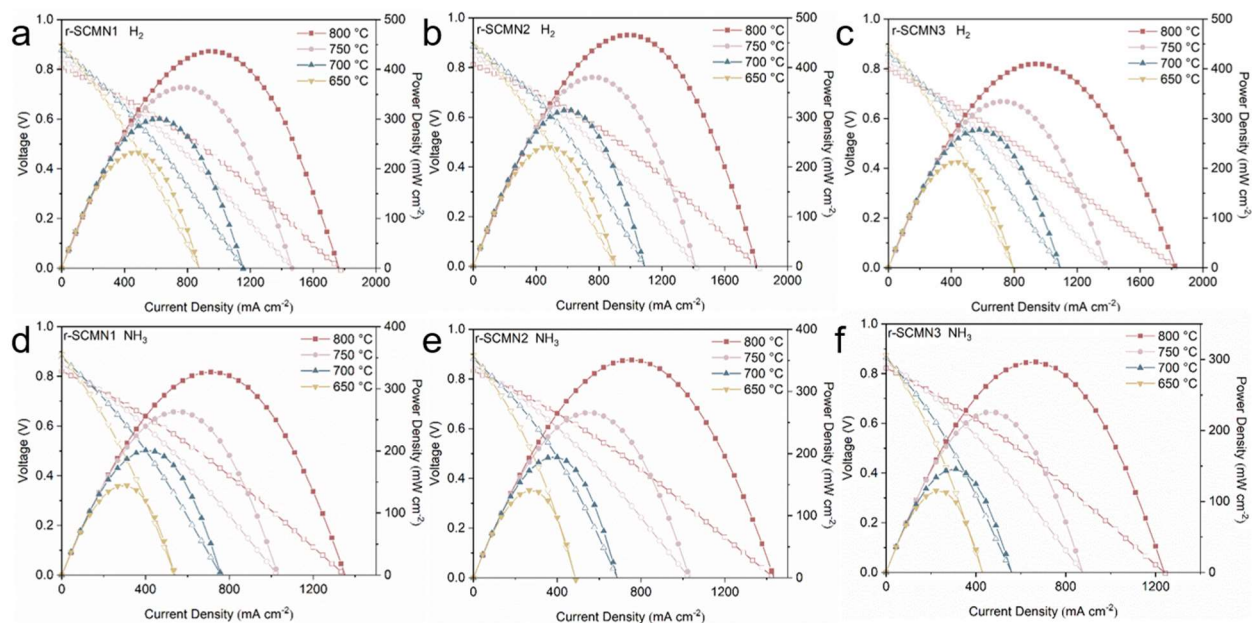

**Figure S9.**  $I$ - $V$  and  $I$ - $P$  curves of SOFCs with (a,d) r-SCMN1, (b,e) r-SCMN2 and (c,f) r-SCMN3 anodes operated on  $H_2$  (a-c) and  $NH_3$  (d-f) fuels at 650-800 °C.

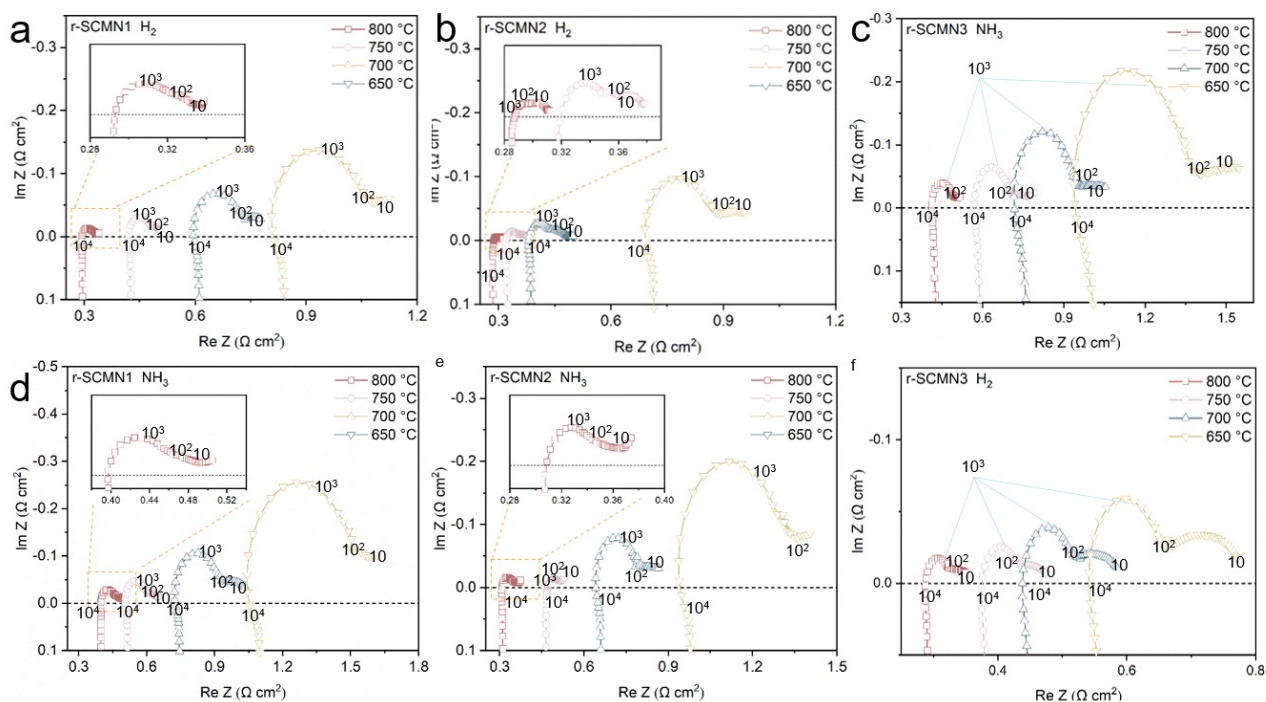

**Figure S10.** EIS spectra of SOFCs with (a,d) r-SCMN1, (b,e) r-SCMN2 and (c,f) r-SCMN3 anodes operated on  $H_2$  (a-c) and  $NH_3$  (d-f) fuels at 650-800 °C.

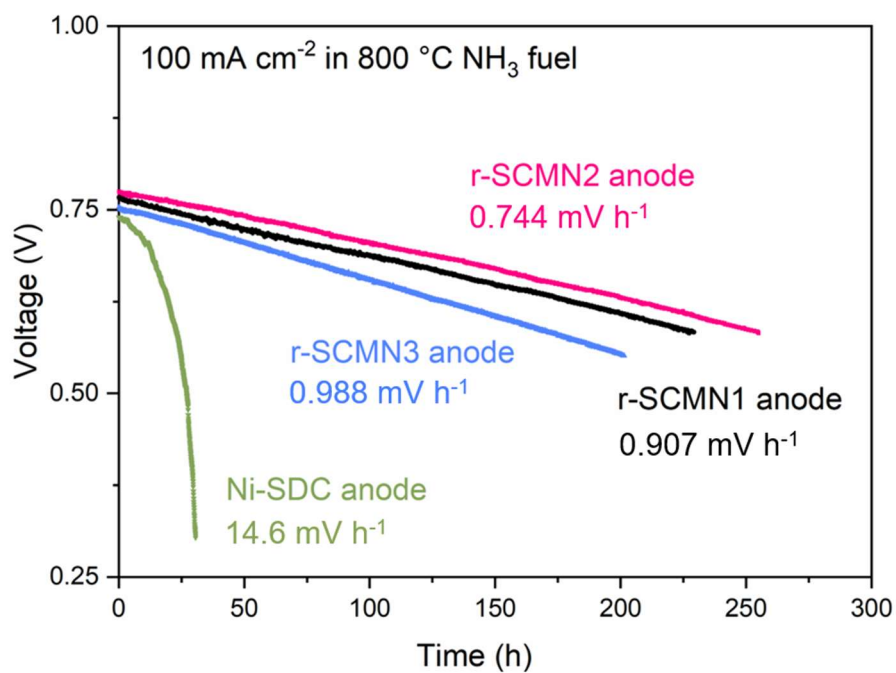

**Figure S11.** Operational stability of single cells with r-SCMN1, r-SCMN2, r-SCMN3 and Ni-SDC anodes operated on NH<sub>3</sub> fuel under a certain current density of 100 mA cm<sup>-2</sup> at 800 °C.

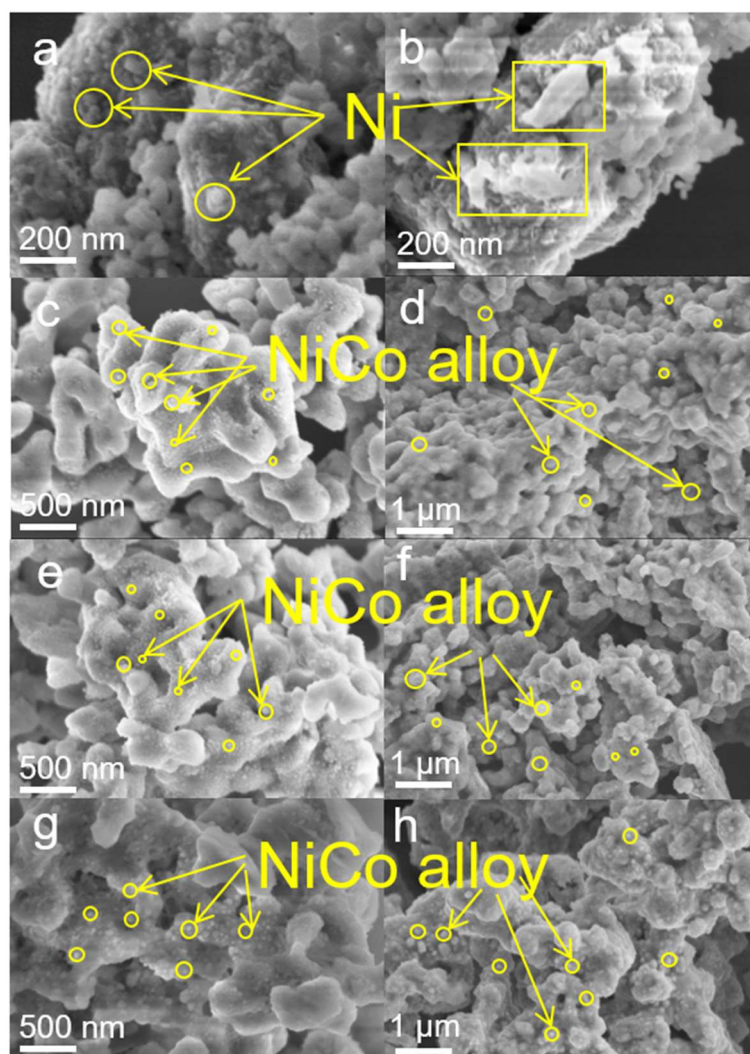

**Figure S12.** SEM images of (a,b) Ni-SDC, (c,d) r-SCMN1, (e,f) r-SCMN2 and (g,h) r-SCMN3 anodes before (a,c,e,g) and after (b,d,f,h) the treatment in  $\text{NH}_3$  fuel at 800 °C for 30 h.

**Table S1.** PPDs comparison of the single cells with r-SCMN anodes at different temperatures in  $\text{H}_2$  and  $\text{NH}_3$  fuels.

| Anode   | Fuel          | PPD ( $\text{mW cm}^{-2}$ ) |        |        |        |
|---------|---------------|-----------------------------|--------|--------|--------|
|         |               | 800 °C                      | 750 °C | 700 °C | 650 °C |
| r-SCMN1 | $\text{H}_2$  | 436                         | 363    | 300    | 232    |
|         | $\text{NH}_3$ | 327                         | 262    | 200    | 144    |
| r-SCMN2 | $\text{H}_2$  | 465                         | 380    | 314    | 239    |
|         | $\text{NH}_3$ | 350                         | 266    | 194    | 141    |
| r-SCMN3 | $\text{H}_2$  | 409                         | 334    | 277    | 212    |
|         | $\text{NH}_3$ | 296                         | 225    | 145    | 115    |

**Table S2.**  $R_p$  values of the single cells with r-SCMN anodes at different temperatures in  $H_2$  and  $NH_3$  fuels.

| Anode   | Fuel   | $R_p (\Omega \text{ cm}^2)$ |        |        |        |
|---------|--------|-----------------------------|--------|--------|--------|
|         |        | 800 °C                      | 750 °C | 700 °C | 650 °C |
| r-SCMN1 | $H_2$  | 0.036                       | 0.068  | 0.126  | 0.225  |
|         | $NH_3$ | 0.063                       | 0.095  | 0.203  | 0.437  |
| r-SCMN2 | $H_2$  | 0.027                       | 0.041  | 0.063  | 0.198  |
|         | $NH_3$ | 0.041                       | 0.054  | 0.158  | 0.410  |
| r-SCMN3 | $H_2$  | 0.045                       | 0.063  | 0.090  | 0.234  |
|         | $NH_3$ | 0.081                       | 0.135  | 0.230  | 0.446  |
| Ni-SDC  | $H_2$  | 0.117                       | 0.185  | 0.279  | 0.369  |
|         | $NH_3$ | 0.140                       | 0.207  | 0.342  | 0.644  |

**Table S3.** PPDs comparison of DA-SOFCs with r-SCMN1, r-SCMN2 and r-SCMN3 anodes developed in this work and other representative anodes reported in the literature.

| Anode               | Electrolyte/Cathode | Electrolyte thickness ( $\mu\text{m}$ ) | PPD ( $\text{mW cm}^{-2}$ ) at 800 °C | Ref.             |
|---------------------|---------------------|-----------------------------------------|---------------------------------------|------------------|
| <b>r-SCMN1</b>      | <b>SDC/SSC</b>      | <b>350</b>                              | <b>327</b>                            | <b>This work</b> |
| <b>r-SCMN2</b>      | <b>SDC/SSC</b>      | <b>350</b>                              | <b>350</b>                            | <b>This work</b> |
| <b>r-SCMN3</b>      | <b>SDC/SSC</b>      | <b>350</b>                              | <b>296</b>                            | <b>This work</b> |
| Ni(40)Fe(60)-SDC    | LSGM/SSC            | 500                                     | 254                                   | [S1]             |
| Ni-SDC              | LSGM/SSC            | 500                                     | 118                                   | [S1]             |
| Ni(97.5)Mo(2.5)-SDC | LSGM/SSC            | 500                                     | 290                                   | [S2]             |
| LSTNC-SDC           | SDC/BSCF            | 350                                     | 361                                   | [S3]             |
| LSTN-SDC            | SDC/BSCF            | 350                                     | 161                                   | [S3]             |
| LSTC-SDC            | SDC/BSCF            | 350                                     | 98                                    | [S3]             |
| r-PSCFRu            | SDC/BCFZY           | 400                                     | 374                                   | [S4]             |
| r-PSCF              | SDC/BCFZY           | 400                                     | 288                                   | [S4]             |
| LZN-YSZ             | YSZ/MNMO-YSZ        | /                                       | 100                                   | [S5]             |
| PZN-YSZ             | YSZ/MNMO-YSZ        | /                                       | 109                                   | [S5]             |
| NZN-YSZ             | YSZ/MNMO-YSZ        | /                                       | 114                                   | [S5]             |
| SZN-YSZ             | YSZ/MNMO-YSZ        | /                                       | 132                                   | [S5]             |
| GDZ-YSZ             | YSZ/MNMO-YSZ        | /                                       | 142                                   | [S5]             |
| Ni-YSZ              | YSZ/Ag              | 400                                     | 75                                    | [S6]             |

LSGM:  $\text{La}_{0.9}\text{Sr}_{0.1}\text{Ga}_{0.8}\text{Mg}_{0.2}\text{O}_{2.85}$ , SSC:  $\text{Sm}_{0.5}\text{Sr}_{0.5}\text{CoO}_{3-\delta}$ , LSTNC:  $\text{La}_{0.52}\text{Sr}_{0.28}\text{Ti}_{0.94}\text{Ni}_{0.03}\text{Co}_{0.03}\text{O}_{3-\delta}$ , LSTN:  $\text{La}_{0.52}\text{Sr}_{0.28}\text{Ti}_{0.94}\text{Ni}_{0.06}\text{O}_{3-\delta}$ , LSTC:  $\text{La}_{0.52}\text{Sr}_{0.28}\text{Ti}_{0.94}\text{Co}_{0.06}\text{O}_{3-\delta}$ , BSCF:  $\text{Ba}_{0.5}\text{Sr}_{0.5}\text{Co}_{0.8}\text{Fe}_{0.2}\text{O}_{3-\delta}$ , PSCF:  $\text{Pr}_{0.6}\text{Sr}_{0.4}\text{Co}_{0.2}\text{Fe}_{0.8}\text{O}_{3-\delta}$ , PSCFRu:  $\text{Pr}_{0.6}\text{Sr}_{0.4}\text{Co}_{0.2}\text{Fe}_{0.75}\text{Ru}_{0.05}\text{O}_{3-\delta}$ , LZN:  $\text{La}_2\text{Zr}_{1.95}\text{Ni}_{0.05}\text{O}_{7+\delta}$ , PZN:  $\text{Pr}_2\text{Zr}_{1.95}\text{Ni}_{0.05}\text{O}_{7+\delta}$ , NZN:  $\text{Nd}_2\text{Zr}_{1.95}\text{Ni}_{0.05}\text{O}_{7+\delta}$ , SZN:  $\text{Sm}_2\text{Zr}_{1.95}\text{Ni}_{0.05}\text{O}_{7+\delta}$ , GDZ:  $\text{Gd}_2\text{Zr}_{1.95}\text{Ni}_{0.05}\text{O}_{7+\delta}$ , MNMO:  $\text{Mg}_{0.4}\text{Ni}_{1.4}\text{Mn}_{1.2}\text{O}_4$



## References

- [S1] Akimoto, W.; Fujimoto, T.; Saito, M.; Inaba, M.; Yoshida, H.; Inagaki, T.; Ni-Fe/Sm-doped CeO<sub>2</sub> Anode for Ammonia-Fueled Solid Oxide Fuel Cells. *Solid State Ionics* 2014, 256, 1-4.
- [S2] Hashinokuchi, M.; Yokochi, R.; Akimoto, W.; Doi, T.; Inaba, M.; Kugai, J. Mechanism and Activity of Ni-Based (Ni-M: M = Fe, Mo, W, Ta) Cermet Anodes for Ammonia Oxidation In SOFCs. *ECS Trans.* 2015, 68, 2739-2744.
- [S3] Song, Y.; Li, H.; Xu, M.; Yang, G.; Wang, W.; Ran, R.; Zhou, W.; Shao, Z. Infiltrated NiCo Alloy Nanoparticle Decorated Perovskite Oxide: A Highly Active, Stable, and Antisintering Anode for Direct-Ammonia Solid Oxide Fuel Cells. *Small* 2020, 16, 2001859.
- [S4] Xiong, X.; Yu, J.; Huang, X.; Zou, D.; Song, Y.; Xu, M.; Ran, R.; Wang, W.; Zhou, W.; Shao, Z. Slightly Ruthenium Doping Enables Better Alloy Nanoparticle Exsolution of Perovskite Anode for High-Performance Direct-Ammonia Solid Oxide Fuel Cells. *J. Mater. Sci. Technol.* 2022, 125, 51-58.
- [S5] Zhong, F.; Wang, X.; Wang, L.; Fang, H.; Luo, Y.; Chen, C.; Lin, L.; Wang, D.; Chen, K.; Jiang, L.; Tuning Geometry Distortion of Pyrochlore RE<sub>2</sub>Zr<sub>1.95</sub>Ni<sub>0.05</sub>O<sub>7+δ</sub> Anodes with Rich Oxygen Vacancies for Ammonia-Fed Solid Oxide Fuel Cell. *Sep. Purif. Technol.* 2023, 312, 123397.
- [S6] Fournier, G.G.M.; Cumming, I.W.; Hellgardt, K. High Performance Direct Ammonia Solid Oxide Fuel Cell. *J. Power Sources* 2006, 162, 198-206.
